# Supplementary material for: Fish consumption and frying of fish in relation to type 2 diabetes incidence: a prospective cohort study of Swedish men
Source: Springer Nature journal article supplement (doi:10.1007/s00394-015-1132-6), 2015-12-21
Supplement: MOESM1 [file 8392614]

**Supplementary table.** Hazard ratios of type 2 diabetes by types of finfish, the Cohort of Swedish Men 1998-2012

|  | **Categories of consumption (median)** | | | **P for trend** |
| --- | --- | --- | --- | --- |
|  | **never/seldom** | **1-3 servings/month** | **≥1 serving/week**  **(1.5)** |  |
| **Herring/mackerel** |  |  |  |  |
| No. of cases | 754 | 2147 | 723 |  |
| Person-years | 100 578 | 289 684 | 77 698 |  |
| Age-adjusted model | 1.00 (ref) | 0.93 (0.86-1.01) | 1.08 (0.98-1.20) | 0.02 |
| Multivariable modela | 1.00 (ref) | 0.93 (0.85-1.02) | 1.03 (0.92-1.14) | 0.28 |
| Multivariable model 2 *(+ contaminants)b* | 1.00 (ref) | 0.90 (0.79-1.03) | 1.00 (0.81-1.24) | 0.59 |
| **Salmon/whitefish/char** |  |  |  |  |
| No. of cases | 1453 | 1877 | 297 |  |
| Person-years | 179 787 | 253 684 | 34 490 |  |
| Age-adjusted model | 1.00 (ref) | 0.93 (0.87-1.00) | 1.03 (0.91-1.16) | 0.82 |
| Multivariable modela | 1.00 (ref) | 0.96 (0.89-1.04) | 0.98 (0.86-1.12) | 0.61 |
| Multivariable model 2 *(+ contaminants)b* | 1.00 (ref) | 0.93 (0.85-1.02) | 0.96 (0.81-1.13) | 0.50 |
| **Cod/saithe/fish fingers** |  |  |  |  |
| No. of cases | 396 | 1961 | 1267 |  |
| Person-years | 46 839 | 250 114 | 171 008 |  |
| Age-adjusted model | 1.00 (ref) | 0.96 (0.86-1.07) | 0.91 (0.81-1.01) | 0.05 |
| Multivariable modela | 1.00 (ref) | 1.03 (0.92-1.15) | 1.02 (0.90-1.14) | 0.90 |
| Multivariable model 2 *(+ contaminants)b* | 1.00 (ref) | 1.04 (0.92-1.18) | 0.97 (0.81-1.16) | 0.37 |

a Adjusted for attained age, body mass index (kg/m2; <20, 20-24.9, 25-29.9, ≥30), physical activity (metabolic equivalent hours per day; quartiles), education (primary school, high school, university), cigarette smoking (never, former, current ≤10 cigarettes/day or >10 cigarettes/day), total energy intake (kcal/day; quintiles), intake of alcohol (g/day; quartiles), DASH diet component score (based on intake of fruits, vegetables, nuts and legumes, low-fat dairy, whole grains, sodium, sweetened beverages, and red and processed meats; quartiles) and consumption of shellfish (never/seldom, 1-3 servings/month, ≥1 serving/week). All finfish items were mutually adjusted.

b Additionally adjusted for dietary exposure to polychlorinated biphenyls (ng/day, quintiles) and methyl mercury (µg/day, quintiles)
